# Supplementary material for: Essential Requirements for Robust Signaling in Hfq Dependent Small RNA Networks
Source: PLoS Comput Biol. 2011 Aug 18;7(8):e1002138. doi: 10.1371/journal.pcbi.1002138 (PMC3158044; doi:10.1371/journal.pcbi.1002138)
Supplement: Table S1 — Kinetic parameters used in the simulations. Abbreviations used to specify the panels in the figures are: top left (TL), top center (TC), top right (TR), middle left (ML), middle center (MC), middle right (MR), bottom left (BL), bottom center (BC) and bottom right (BR). ‡ indicates sRNA-target mRNA pairs that form “stable” complexes with Hfq and ◊ indicates “unstable” complexes with Hfq (Figure 9U). £ Two sRNA-target mRNA pairs were simulated which have the same kinetic parameters (both panels represent the same set of simulations with varying sRNA1 production). ¶ Control topologies (solid curves). ¥ Topologies with increased RNA dissociation relative to the control (dash curves). § Topologies exhibiting non-cognate exclusion (dot curves). Hfq production (αH) in all panels is varied from 10−5 to 107 concentration·time−1 unless otherwise indicated. conc. = concentration. (DOC) [file pcbi.1002138.s002.doc]

**Supporting Information Table S1. Kinetic parameters used in the simulations.**

| **Fig 2C** | **units** | **TL** | **TC** | **TR** | **ML** | **MC** | **MR** | **BL** | **BC** | **BR** |
| --- | --- | --- | --- | --- | --- | --- | --- | --- | --- | --- |
| k1 | conc.-1·time-1 | 106.5 | 104.5 | 102.5 | 104.5 | 102.5 | 100.5 | 102.5 | 100.5 | 10-1.5 |
| k2 | conc.-1·time-1 | 102.5 | 104.5 | 106.5 | 100.5 | 102.5 | 104.5 | 10-1.5 | 100.5 | 102.5 |
| k3 | conc.-1·time-1 | 102.5 | 104.5 | 106.5 | 100.5 | 102.5 | 104.5 | 10-1.5 | 100.5 | 102.5 |
| k4 | conc.-1·time-1 | 106.5 | 104.5 | 102.5 | 104.5 | 102.5 | 100.5 | 102.5 | 100.5 | 10-1.5 |
| k5 | time-1 | 103 | 103 | 103 | 103 | 103 | 103 | 103 | 103 | 103 |
| k-1,-2,-3,-4 | time-1 | 0 | 0 | 0 | 0 | 0 | 0 | 0 | 0 | 0 |
| S,T | conc.·time-1 | 102 | 102 | 102 | 102 | 102 | 102 | 102 | 102 | 102 |
|  | time-1 | 100 | 100 | 100 | 100 | 100 | 100 | 100 | 100 | 100 |
| **Fig 3C** | **units** | **TL** | **TC** | **TR** | **ML** | **MC** | **MR** | **BL** | **BC** | **BR** |
| k1 | conc.-1·time-1 | 106.5 | 104.5 | 102.5 | 104.5 | 102.5 | 100.5 | 102.5 | 10-1.5 | 10-1.5 |
| k2 | conc.-1·time-1 | 102.5 | 104.5 | 106.5 | 100.5 | 102.5 | 104.5 | 10-1.5 | 10-1.5 | 102.5 |
| k3 | conc.-1·time-1 | 102.5 | 100.5 | 10-1.5 | 104.5 | 102.5 | 100.5 | 106.5 | 106.5 | 102.5 |
| k4 | conc.-1·time-1 | 10-1.5 | 100.5 | 102.5 | 100.5 | 102.5 | 104.5 | 102.5 | 106.5 | 106.5 |
| k5 | time-1 | 103 | 103 | 103 | 103 | 103 | 103 | 103 | 103 | 103 |
| k-1,-2,-3,-4 | time-1 | 0 | 0 | 0 | 0 | 0 | 0 | 0 | 0 | 0 |
| S,T | conc.·time-1 | 102 | 102 | 102 | 102 | 102 | 102 | 102 | 102 | 102 |
|  | time-1 | 100 | 100 | 100 | 100 | 100 | 100 | 100 | 100 | 100 |
| **Fig 3F** | **units** | **TL** | **TC** | **TR** | **ML** | **MC** | **MR** | **BL** | **BC** | **BR** |
| k1,2,3,4 | conc.-1·time-1 | 102.5 | 102.5 | 102.5 | 102.5 | 102.5 | 102.5 | 102.5 | 102.5 | 102.5 |
| k5 | time | 100 | 103 | 106 | 100 | 103 | 106 | 100 | 103 | 106 |
| k-1,-2,-3,-4 | time | 108 | 108 | 108 | 104 | 104 | 104 | 100 | 100 | 100 |
| S,T | conc.·time-1 | 102 | 102 | 102 | 102 | 102 | 102 | 102 | 102 | 102 |
|  | time-1 | 100 | 100 | 100 | 100 | 100 | 100 | 100 | 100 | 100 |
| **Fig 4A** | **units** | **TL** | **TC** | **TR** | **ML** | **MC** | **MR** | **BL** | **BC** | **BR** |
| k1,2 | conc.-1·time-1 | 102.5 |  | 102.5 |  |  |  | 102.5 |  | 100.5 |
| k3,4 | conc.-1·time-1 | 102.5 |  | 102.5 |  |  |  | 102.5 |  | 104.5 |
| k5 | time-1 | 103 |  | 103 |  |  |  | 103 |  | 103 |
| k-1,-2,-3,-4 | time-1 | 0 |  | 0 |  |  |  | 104 |  | 104 |
| S,T | conc.·time-1 | 102 |  | 102 |  |  |  | 102 |  | 102 |
|  | time-1 | 100 |  | 100 |  |  |  | 100 |  | 100 |
| **Fig 4B** | **Units** | **TL** | **TC** | **TR** | **ML** | **MC** | **MR** | **BL** | **BC** | **BR** |
| k1,2 | conc.-1·time-1 | 102.5 |  | 100.5 |  |  |  | 102.5 |  | 100.5 |
| k3,4 | conc.-1·time-1 | 102.5 |  | 104.5 |  |  |  | 102.5 |  | 104.5 |
| k5 | time-1 | 103 |  | 103 |  |  |  | 103 |  | 103 |
| k-1,-2 | time-1 | 104 |  | 104 |  |  |  | 106 |  | 106 |
| k-3,-4 | time-1 | 104 |  | 104 |  |  |  | 102 |  | 102 |
| S,T | conc.·time-1 | 102 |  | 102 |  |  |  | 102 |  | 102 |
|  | time-1 | 100 |  | 100 |  |  |  | 100 |  | 100 |
| **Fig 6C** | **Units** | **TL** | **TC** | **TR** | **ML** | **MC** | **MR** | **BL** | **BC** | **BR** |
| k1,2,3,4 | conc.-1·time-1 | 102.5 |  | 102.5 |  |  |  | 102.5 |  | 102.5 |
| k5 | time-1 | 103 |  | 103 |  |  |  | 103 |  | 103 |
| k-1,-2,-3,-4 | time-1 | 100 |  | 100 |  |  |  | 100 |  | 100 |
| S,T | conc.·time-1 | 102 |  | 102 |  |  |  | 102 |  | 102 |
|  | time-1 | 100 |  | 100 |  |  |  | 100 |  | 100 |

**Supporting Information Table S1. (continued)**

| **Fig 7B,C** | **units** | **TL** | **TC** | **TR** | **ML** | **MC** | **MR** | **BL** | **BC** | **BR** |
| --- | --- | --- | --- | --- | --- | --- | --- | --- | --- | --- |
| k1,2 | conc.-1·time-1 | 102.5 |  | 102.5 |  |  |  | 102.5 |  | 102.5 |
| k3,4 | conc.-1·time-1 | 102.5 |  | 103.5 |  |  |  | 102.5 |  | 103.5 |
| k*3,4 | conc.-1·time-1 | 102.5 |  | 102.5 |  |  |  | 101.5 |  | 101.5 |
| k5 | time-1 | 103 |  | 103 |  |  |  | 103 |  | 103 |
| k-1,-2 | time-1 | 100 |  | 100 |  |  |  | 100 |  | 100 |
| k-3,-4 | time-1 | 100 |  | 10-1 |  |  |  | 100 |  | 10-1 |
| k*-3,-4 | time-1 | 100 |  | 100 |  |  |  | 101 |  | 101 |
| S,T | conc.·time-1 | 102 |  | 102 |  |  |  | 102 |  | 102 |
|  | time-1 | 100 |  | 100 |  |  |  | 100 |  | 100 |
| **Fig 8B,C** | **units** | **TL** | **TC** | **TR** | **ML** | **MC** | **MR** | **BL** | **BC** | **BR** |
| k1,2,3,4 | conc.-1·time-1 | 102.5 |  | 102.5 |  |  |  | 102.5 |  | 102.5 |
| k*3,4 | conc.-1·time-1 | 102.5 |  | 102.5 |  |  |  | 102.5 |  | 102.5 |
| k5 | time-1 | 103 |  | 103 |  |  |  | 106 |  | 106 |
| k-1,-2,-3,-4 | time-1 | 100 |  | 104 |  |  |  | 100 |  | 104 |
| k*-3,-4 | time-1 | 100 |  | 104 |  |  |  | 100 |  | 104 |
| S,T | conc.·time-1 | 102 |  | 102 |  |  |  | 102 |  | 102 |
|  | time-1 | 100 |  | 100 |  |  |  | 100 |  | 100 |
| **Fig 9‡** | **units** | **TL** | **TC** | **TR** | **ML** | **MC** | **MR** | **BL** | **BC** | **BR** |
| k1,2,3,4 | conc.-1·time-1 | 102 |  |  |  |  |  |  |  |  |
| k*3,4 | conc.-1·time-1 | 102 |  |  |  |  |  |  |  |  |
| k5 | time-1 | 101.5 |  |  |  |  |  |  |  |  |
| k-1,-2,-3,-4 | time-1 | 100 |  |  |  |  |  |  |  |  |
| k*-3,-4 | time-1 | 100 |  |  |  |  |  |  |  |  |
| T,S | conc.·time-1 | 102 |  |  |  |  |  |  |  |  |
|  | time-1 | 100 |  |  |  |  |  |  |  |  |
| **Fig 9◊** | **units** | **TL** | **TC** | **TR** | **ML** | **MC** | **MR** | **BL** | **BC** | **BR** |
| k1,2,3,4 | conc.-1·time-1 | 102 |  |  |  |  |  |  |  |  |
| k*3,4 | conc.-1·time-1 | 102 |  |  |  |  |  |  |  |  |
| k5 | time-1 | 101.5 |  |  |  |  |  |  |  |  |
| k-1,-2,-3,-4 | time-1 | 104 |  |  |  |  |  |  |  |  |
| k*-3,-4 | time-1 | 104 |  |  |  |  |  |  |  |  |
| T,S | conc.·time-1 | 102 |  |  |  |  |  |  |  |  |
|  | time-1 | 100 |  |  |  |  |  |  |  |  |
| **Fig 10** | **units** | **TL** | **TC** | **TR** | **ML** | **MC** | **MR** | **BL** | **BC** | **BR** |
| k1,2,3,4 | conc.-1·time-1 | 102.5 |  | 102.5 |  |  |  | 102.5 |  | 102.5 |
| k*3,4 | conc.-1·time-1 | 102.5 |  | 102.5 |  |  |  | 102.5 |  | 102.5 |
| k5 | time-1 | 103 |  | 103 |  |  |  | 103 |  | 103 |
| k*5 | time-1 | 0 |  | 0 |  |  |  | 103 |  | 103 |
| k-1,-2,-3,-4 | time-1 | 100 |  | 104 |  |  |  | 100 |  | 104 |
| k*-3,-4 | time-1 | 100 |  | 104 |  |  |  | 100 |  | 104 |
| S,T | conc.·time-1 | 102 |  | 102 |  |  |  | 102 |  | 102 |
|  | time-1 | 100 |  | 100 |  |  |  | 100 |  | 100 |

**Supporting Information Table S1. (continued)**

| **Fig 11B** | **units** | **TL** | **TC** | **TR** | **ML** | **MC** | **MR** | **BL** | **BC** | **BR** |
| --- | --- | --- | --- | --- | --- | --- | --- | --- | --- | --- |
| k1,3 | conc.-1·time-1 | 106 | 10-2 | 102 |  |  |  |  |  |  |
| k2,4 | conc.-1·time-1 | 10-2 | 106 | 102 |  |  |  |  |  |  |
| k5 | time-1 | 101 | 101 | 101 |  |  |  |  |  |  |
| k-1,-2,-3,-4 | time-1 | 0 | 0 | 0 |  |  |  |  |  |  |
| S | conc.·time-1 | 17-83 | 17-83 | 17-83 |  |  |  |  |  |  |
| T | conc.·time-1 | 17-83 | 17-83 | 17-83 |  |  |  |  |  |  |
| H | conc.·time-1 | 102 | 102 | 102 |  |  |  |  |  |  |
|  | time-1 | 100 | 100 | 100 |  |  |  |  |  |  |
| **Fig 12B£** | **units** | **TL** | **TC** | **TR** | **ML** | **MC** | **MR** | **BL** | **BC** | **BR** |
| k1,2,3,4 | conc.-1·time-1 | 102.5 |  |  |  |  |  |  |  |  |
| k*3,4 | conc.-1·time-1 | 102.5 |  |  |  |  |  |  |  |  |
| k5 | time-1 | 101.5 |  |  |  |  |  |  |  |  |
| k-1,-2,-3,-4 | time-1 | 101 |  |  |  |  |  |  |  |  |
| k*-3,-4 | time-1 | 101 |  |  |  |  |  |  |  |  |
| S1 | conc.·time-1 | 102-104 |  |  |  |  |  |  |  |  |
| T1,S2,T2 | conc.·time-1 | 102 |  |  |  |  |  |  |  |  |
|  | time-1 | 100 |  |  |  |  |  |  |  |  |
| **Fig 13**¶ | **units** | **TL** | **TC** | **TR** | **ML** | **MC** | **MR** | **BL** | **BC** | **BR** |
| k1,4 | conc.-1·time-1 | 102.5 |  | 102.5 | 103.5 |  | 103.5 | 101.5 |  | 101.5 |
| k2,3 | conc.-1·time-1 | 102.5 |  | 102.5 | 101.5 |  | 101.5 | 103.5 |  | 103.5 |
| k*3 | conc.-1·time-1 | 102.5 |  | 102.5 | 101.5 |  | 101.5 | 103.5 |  | 103.5 |
| k*4 | conc.-1·time-1 | 102.5 |  | 102.5 | 103.5 |  | 103.5 | 101.5 |  | 101.5 |
| k5 | time-1 | 103 |  | 103 | 103 |  | 103 | 103 |  | 103 |
| k-1,-4 | time-1 | 100 |  | 100 | 10-1 |  | 10-1 | 101 |  | 101 |
| k-2,-3 | time-1 | 100 |  | 100 | 101 |  | 101 | 10-1 |  | 10-1 |
| k*-3 | time-1 | 100 |  | 100 | 101 |  | 101 | 10-1 |  | 10-1 |
| k*-4 | time-1 | 100 |  | 100 | 10-1 |  | 10-1 | 101 |  | 101 |
| S1,T1 | conc.·time-1 | 102 |  | 102 | 102 |  | 102 | 102 |  | 102 |
| T non-cog. | conc.·time-1 | 0 |  | 104 | 0 |  | 104 | 0 |  | 104 |
|  | time-1 | 100 |  | 100 | 100 |  | 100 | 100 |  | 100 |
| **Fig 13**¥ | **units** | **TL** | **TC** | **TR** | **ML** | **MC** | **MR** | **BL** | **BC** | **BR** |
| k1,4 | conc.-1·time-1 | 102.5 |  | 102.5 | 103.5 |  | 103.5 | 101.5 |  | 101.5 |
| k2,3 | conc.-1·time-1 | 102.5 |  | 102.5 | 101.5 |  | 101.5 | 103.5 |  | 103.5 |
| k*3 | conc.-1·time-1 | 102.5 |  | 102.5 | 101.5 |  | 101.5 | 103.5 |  | 103.5 |
| k*4 | conc.-1·time-1 | 102.5 |  | 102.5 | 103.5 |  | 103.5 | 101.5 |  | 101.5 |
| k5 | time-1 | 103 |  | 103 | 103 |  | 103 | 103 |  | 103 |
| k-1,-4 | time-1 | 102 |  | 102 | 101 |  | 101 | 103 |  | 103 |
| k-2,-3 | time-1 | 102 |  | 102 | 103 |  | 103 | 101 |  | 101 |
| k*-3 | time-1 | 102 |  | 102 | 103 |  | 103 | 101 |  | 101 |
| k*-4 | time-1 | 102 |  | 102 | 101 |  | 101 | 103 |  | 103 |
| S1,T1 | conc.·time-1 | 102 |  | 102 | 102 |  | 102 | 102 |  | 102 |
| T non-cog. | conc.·time-1 | 0 |  | 104 | 0 |  | 104 | 0 |  | 104 |
|  | time-1 | 100 |  | 100 | 100 |  | 100 | 100 |  | 100 |

**Supporting Information Table S1. (continued)**

| **Fig 13**§ | **units** | **TL** | **TC** | **TR** | **ML** | **MC** | **MR** | **BL** | **BC** | **BR** |
| --- | --- | --- | --- | --- | --- | --- | --- | --- | --- | --- |
| k1,4 | conc.-1·time-1 | 102.5 |  | 102.5 | 103.5 |  | 103.5 | 101.5 |  | 101.5 |
| k2,3 | conc.-1·time-1 | 102.5 |  | 102.5 | 101.5 |  | 101.5 | 103.5 |  | 103.5 |
| k*3 | conc.-1·time-1 | 102.5 |  | 102.5 | 101.5 |  | 101.5 | 103.5 |  | 103.5 |
| k*4 | conc.-1·time-1 | 102.5 |  | 102.5 | 103.5 |  | 103.5 | 101.5 |  | 101.5 |
| k5 | time-1 | 103 |  | 103 | 103 |  | 103 | 103 |  | 103 |
| k-1,-4 | time-1 | 100 |  | 100 | 10-1 |  | 10-1 | 101 |  | 101 |
| k-2,-3 | time-1 | 100 |  | 100 | 101 |  | 101 | 10-1 |  | 10-1 |
| k*-3 | time-1 | 102 |  | 102 | 103 |  | 103 | 101 |  | 101 |
| k*-4 | time-1 | 102 |  | 102 | 101 |  | 101 | 103 |  | 103 |
| S1,T1 | conc.·time-1 | 102 |  | 102 | 102 |  | 102 | 102 |  | 102 |
| T non-cog. | conc.·time-1 | 0 |  | 104 | 0 |  | 104 | 0 |  | 104 |
|  | time-1 | 100 |  | 100 | 100 |  | 100 | 100 |  | 100 |
| **FigS1** | **units** | **TL** | **TC** | **TR** | **ML** | **MC** | **MR** | **BL** | **BC** | **BR** |
| k1,2 | conc.-1·time-1 |  |  |  |  |  |  | 102.5 | 100.5 | 102.5 |
| k3,4 | conc.-1·time-1 |  |  |  |  |  |  | 102.5 | 104.5 | 102.5 |
| k5 | time-1 |  |  |  |  |  |  | 103 | 103 | 103 |
| k-1,-2,-3,-4 | time-1 |  |  |  |  |  |  | 0 | 0 | 104 |
| S,T | conc.·time-1 |  |  |  |  |  |  | 102 | 102 | 102 |
| S free (blk) | time-1 |  |  |  |  |  |  | 100 | 100 | 100 |
| S free (red) | time-1 |  |  |  |  |  |  | 101 | 101 | 101 |
|  | time-1 |  |  |  |  |  |  | 100 | 100 | 100 |
